# Supplementary material
Source: PubMed Central journal article supplement (PMC7167480)
Supplement: JB.00693-19-s0001.pdf [file JB.00693-19-s0001.pdf]

1 Supplemental material for:  
2 FtsA regulates Z-ring morphology and cell wall metabolism in an FtsZ C-terminal linker  
3 dependent manner in *C. crescentus*  
4 Jordan M. Barrows\*, Kousik Sundararajan\*#, Anant Bhargava, and Erin D. Goley  
5  
6 Department of Biological Chemistry, Johns Hopkins University School of Medicine, Baltimore,  
7 MD 21205  
8  
9 \* These authors contributed equally to this work.  
10 # Current affiliation: Department of Biochemistry, Stanford University, Stanford, CA 94305

11 **Supplemental references:**

- 12 1. Goley ED, Dye NA, Werner JN, Gitai Z, Shapiro L. 2010. Imaging-Based Identification of a  
13 Critical Regulator of FtsZ Protofilament Curvature in *Caulobacter*. *Molecular Cell* 39:975–  
14 987.
- 15 2. Sundararajan K, Miguel A, Desmarais SM, Meier EL, Huang KC, Goley ED. 2015. The  
16 bacterial tubulin FtsZ requires its intrinsically disordered linker to direct robust cell wall  
17 construction. *Nature Communications* 1–14.
- 18 3. Woldemeskel SA, McQuillen R, Hessel AM, Xiao J, Goley ED. 2017. A conserved coiled-  
19 coil protein pair focuses the cytokinetic Z-ring in *Caulobacter crescentus*. *Molecular*  
20 *Microbiology* 105:721–740.
- 21 4. Ohta N, Ninfa AJ, Allaire A, Kulick L, Newton A. 1997. Identification, characterization,  
22 and chromosomal organization of cell division cycle genes in *Caulobacter crescentus*.  
23 *Journal of Bacteriology* 179:2169–2180.
- 24 5. Meier EL, Razavi S, Inoue T, Goley ED. 2016. A novel membrane anchor for FtsZ is linked  
25 to cell wall hydrolysis in *Caulobacter crescentus*. *Molecular Microbiology* 101:265–280.
- 26 6. Meier EL, Daitch AK, Yao Q, Bhargava A, Jensen GJ, Goley ED. 2017. FtsEX-mediated  
27 regulation of the final stages of cell division reveals morphogenetic plasticity in  
28 *Caulobacter crescentus*. *PLoS Genet* 13:e1006999.
- 29 7. Thanbichler M, Iniesta AA, Shapiro L. 2007. A comprehensive set of plasmids for vanillate-  
30 and xylose-inducible gene expression in *Caulobacter crescentus*. *Nucleic Acids Res*  
31 35:e137.
- 32 8. Evinger M, Agabian N. 1977. Envelope-associated nucleoid from *Caulobacter crescentus*  
33 stalked and swarmer cells. *Journal of Bacteriology* 132:294–301.
- 34 9. Goley ED, Yeh Y-C, Hong S-H, Fero MJ, Abeliuk E, McAdams HH, Shapiro L. 2011.  
35 Assembly of the *Caulobacter* cell division machine. *Molecular Microbiology* 80:1680–  
36 1698.
- 37 10. Thanbichler M, Shapiro L. 2006. MipZ, a spatial regulator coordinating chromosome  
38 segregation with cell division in *Caulobacter*. *Cell* 126:147–162.
- 39 11. Du S, Park KT, Lutkenhaus J. 2015. Oligomerization of FtsZ converts the FtsZ tail motif  
40 (conserved carboxy-terminal peptide) into a multivalent ligand with high avidity for partners  
41 ZipA and SlmA. *Molecular Microbiology* 95:173–188.
- 42 12. The PyMOL Molecular Graphics System, Version 2.0, Schrödinger, LLC.

44 **Supplemental figures:**

45

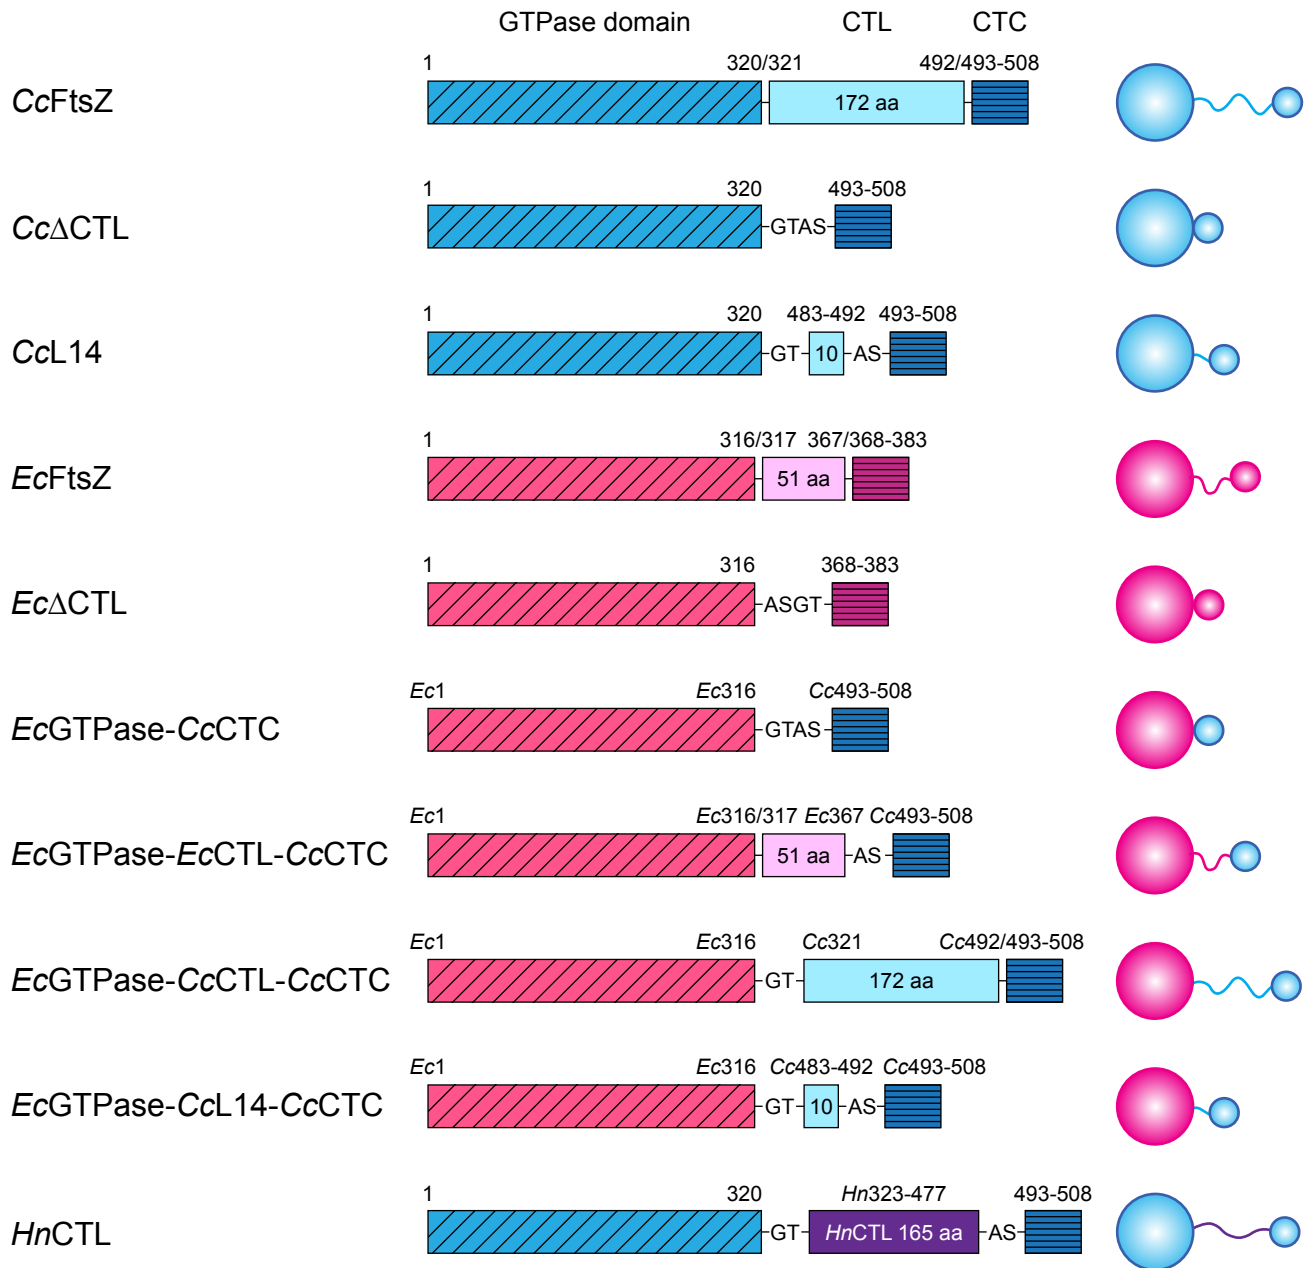

Figure S1



46 **Figure S1: Domain architecture of FtsZ CTL variants**

47 Domain structures of *Cc*FtsZ, *Cc*ΔCTL, *Cc*L14, *Ec*FtsZ, *Ec*ΔCTL, *Cc/Ec* chimeras, and *Hn*CTL

48 FtsZ variants used in this study. Residue numbers are indicated.

49

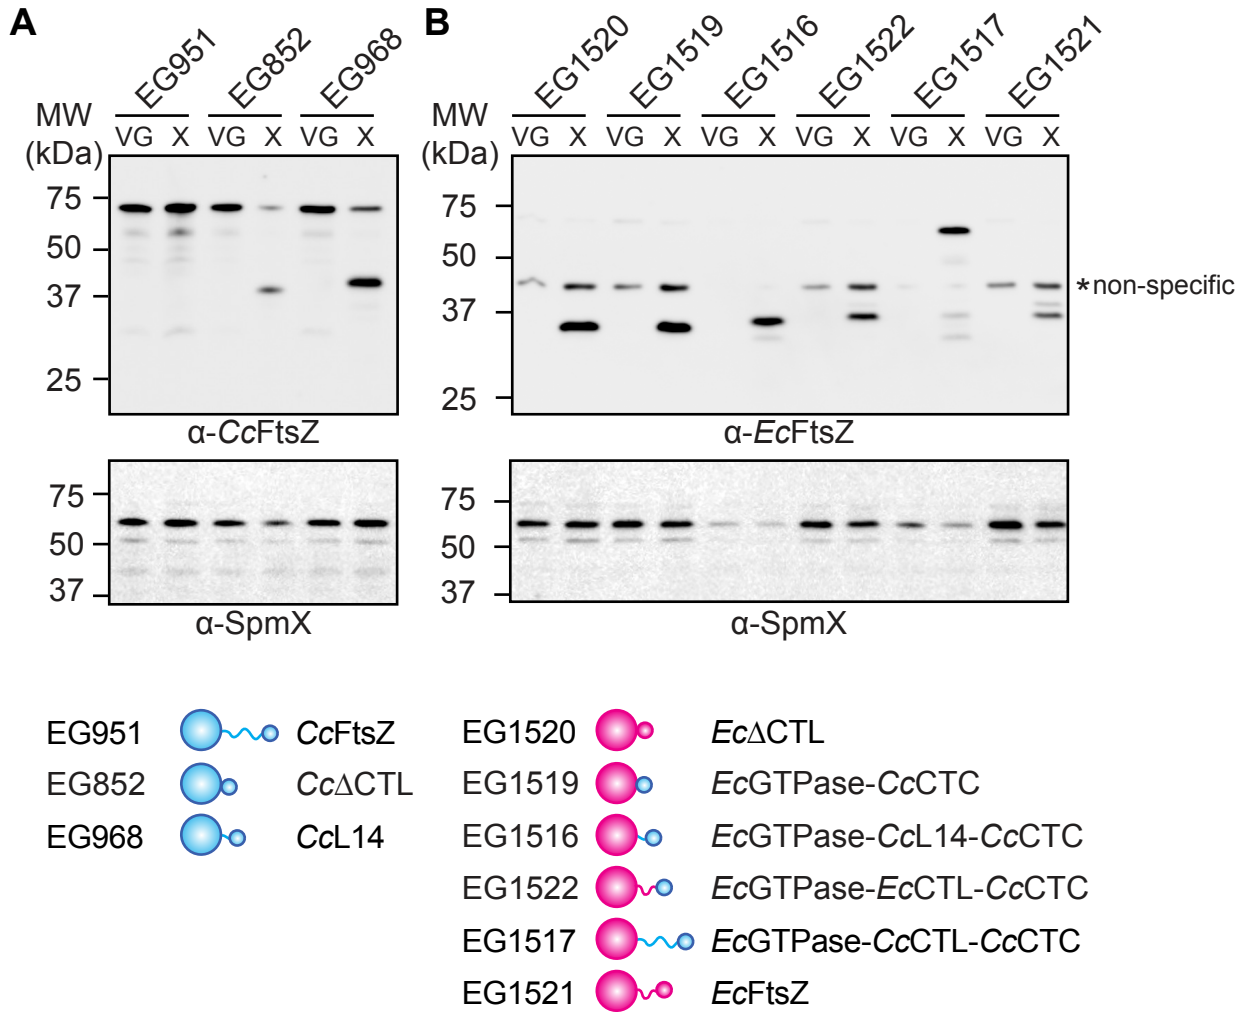

Figure S2

50 **Figure S2: FtsZ chimeras are produced to similar steady state levels.**

51 **A.-B.** Immunoblots using anti-*CcFtsZ* (**A**) and anti-*EcFtsZ* (**B**) antibodies showing levels of  
52 chimeric FtsZ variants shown in Figure 1A. SpmX was used as a loading control. VG –  
53 vanillate+glucose control with only WT *CcFtsZ* expression. X – xylose driven expression of  
54 FtsZ chimeras for 5 hours. Anti-SpmX antibody was used as concentration control for loading.  
55 Strain key: *CcFtsZ* (EG951), *Cc*ΔCTL (EG852), *CcL14* (EG968), *EcFtsZ* (EG1521), *Ec*ΔCTL  
56 (EG1520), *EcGTPase-CcCTC* (EG1519), *EcGTPase-EcCTL-CcCTC* (EG1522), *EcGTPase-*  
57 *CcCTL-CcCTC* (EG1517), *EcGTPase-CcL14-CcCTC* (EG1516)

58

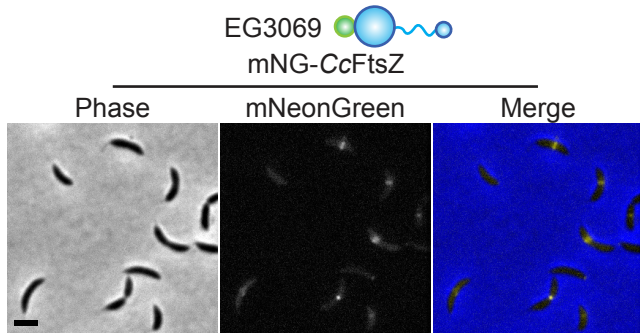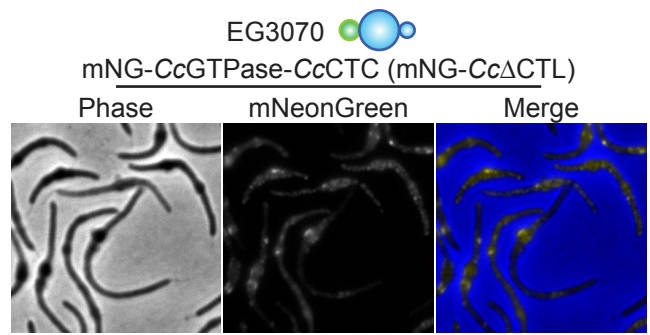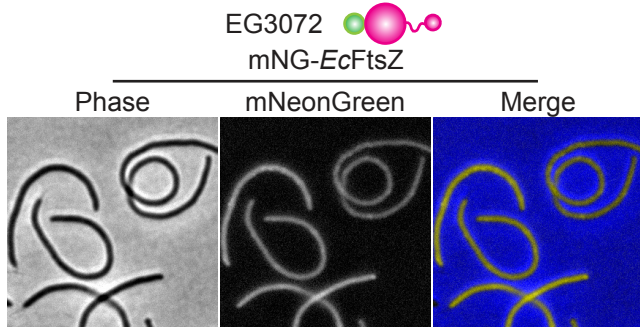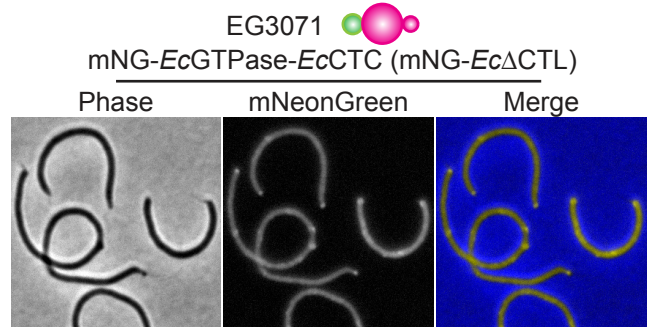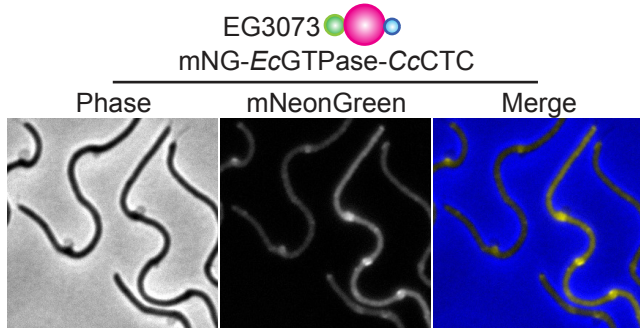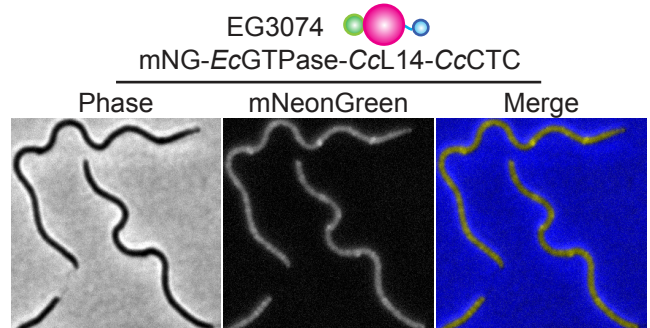

Figure S3

59 **Figure S3: The *E. coli* GTPase domain is unable to localize properly when produced in *C.***  
60 ***crenscentus*.**

61 Phase contrast, epifluorescence, and merged images of cells induced with xylose to drive  
62 production of indicated mNeonGreen (green) fusions to *C. crescentus* FtsZ (cyan), *E. coli* FtsZ  
63 (magenta), CTL truncations, or their chimeric variants from P<sub>xyLX</sub> for 5 hours prior to imaging.  
64 Scale bar – 2 μm. Strain key: mNG-*Cc*FtsZ (EG3069), mNG-*Cc*ΔCTL (EG3070), mNG-*Ec*FtsZ  
65 (EG3072), mNG-*Ec*ΔCTL (EG3071), mNG-*Ec*GTPase-*Cc*CTC (EG3073), mNG-*Ec*GTPase-  
66 *Cc*L14-*Cc*CTC (EG3074)

67

**A**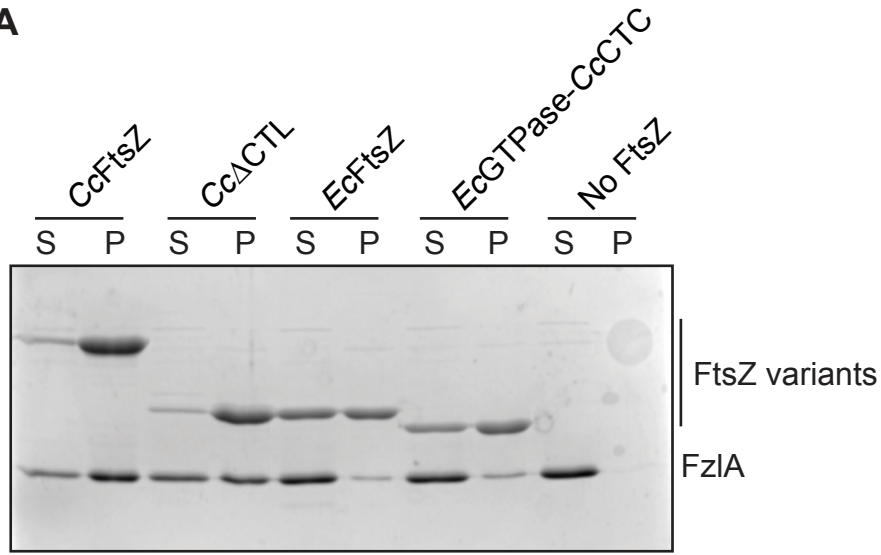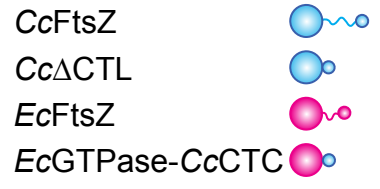**B**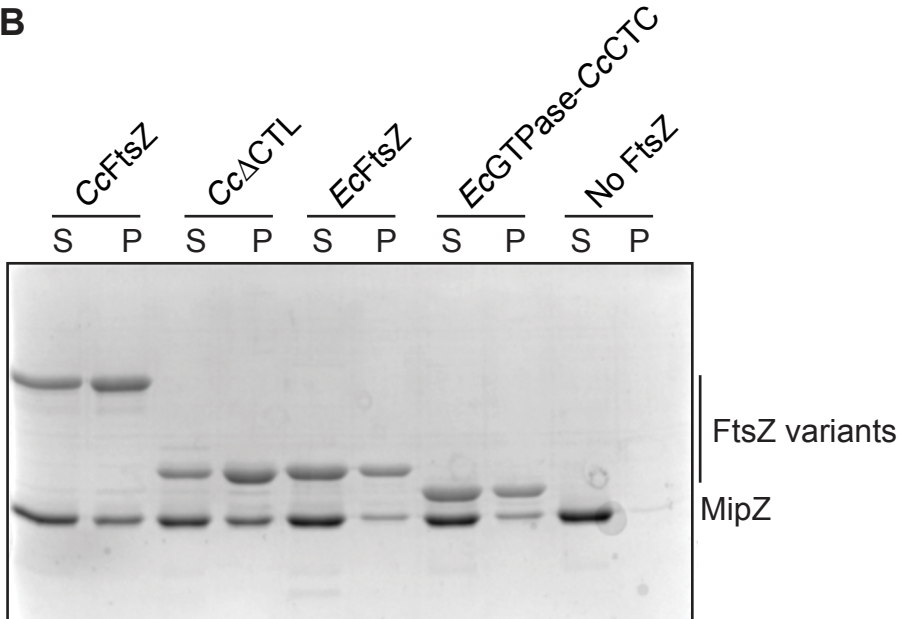

Figure S4

68 **Figure S4: FzlA and MipZ do not bind efficiently to the GTPase domain of *E. coli* FtsZ.**

69 **A.-B.** Coomassie-stained SDS-PAGE of supernatant (S) and pellet (P) after high-speed

70 centrifugation of 5  $\mu$ M FzlA (**A**) or MipZ (**B**) with 5  $\mu$ M *Cc*FtsZ, *Cc* $\Delta$ CTL, *Ec*FtsZ, *Ec*GTPase-

71 *Cc*CTC, or no FtsZ variant incubated in HEK50 buffer with 10 mM MgCl<sub>2</sub>, 2 mM GTP, 0.05%

72 Triton X-100, and, for B., 2 mM ATP.

73

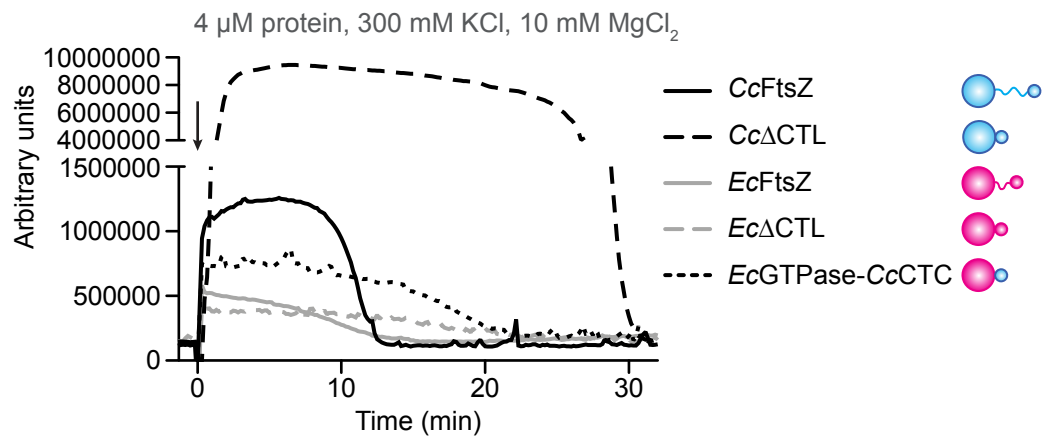

Figure S5



74 **Figure S5: *C. crescentus* and *E. coli*  $\Delta$ CTL variants exhibit increased stability compared to**  
75 **their respective FtsZs**

76 Right angle light scatter at 350 nm over time for 4  $\mu$ M FtsZ variants incubated in HEK300 buffer  
77 with 10 mM MgCl<sub>2</sub> and 0.5 mM GTP (added at time  $t = 0$  min; black arrow). Representative  
78 curves of three independent replicates are shown for each variant.

79

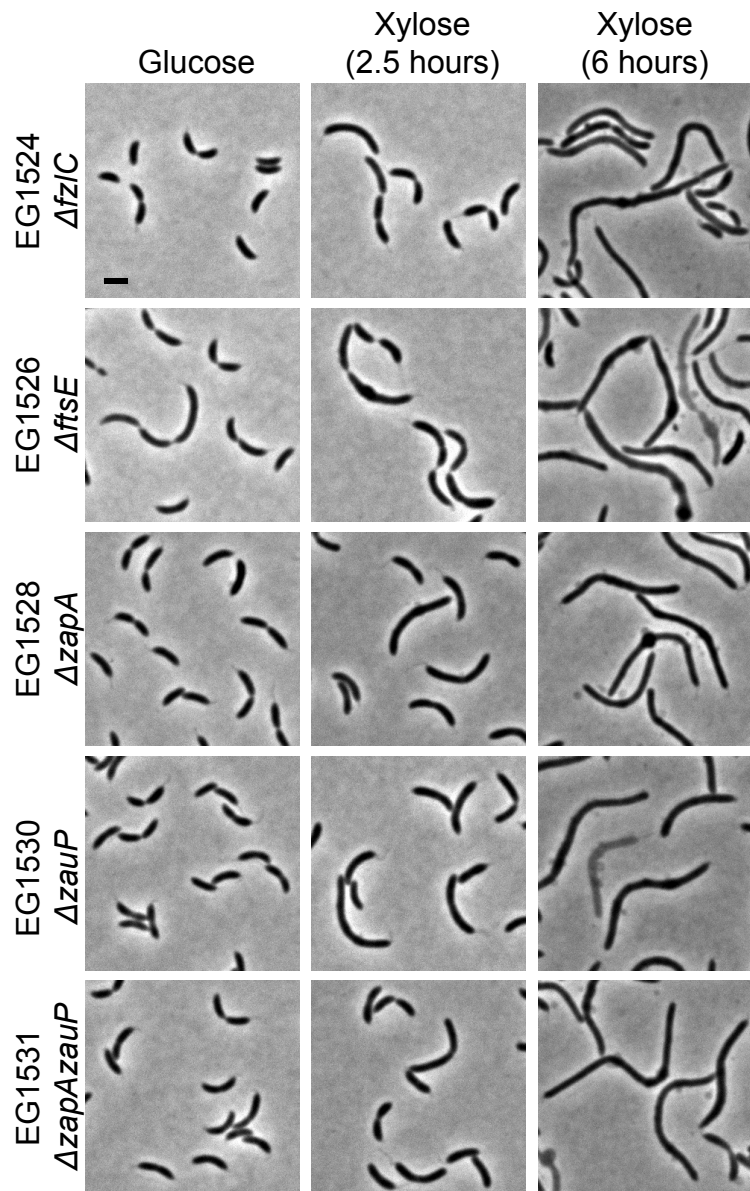

Figure S6

80 **Figure S6: Non-essential FtsZ-binding partners are not required for  $\Delta CTL$ -induced bulges.**

81 Phase contrast images showing the morphologies of cells in the absence and presence of inducer

82 (xylose) for expression of  $\Delta CTL$  in strains deleted for the non-essential binding partners of FtsZ.

83 Scale bar – 2  $\mu\text{m}$ . Strain key (all have xylose-inducible  $\Delta CTL$ ):  $\Delta fzIC$  (EG1524),  $\Delta ftsE$

84 (EG1526),  $\Delta zapA$  (EG1528),  $\Delta zauP$  (EG1530),  $\Delta zapA\ zauP$  (EG1531)

85

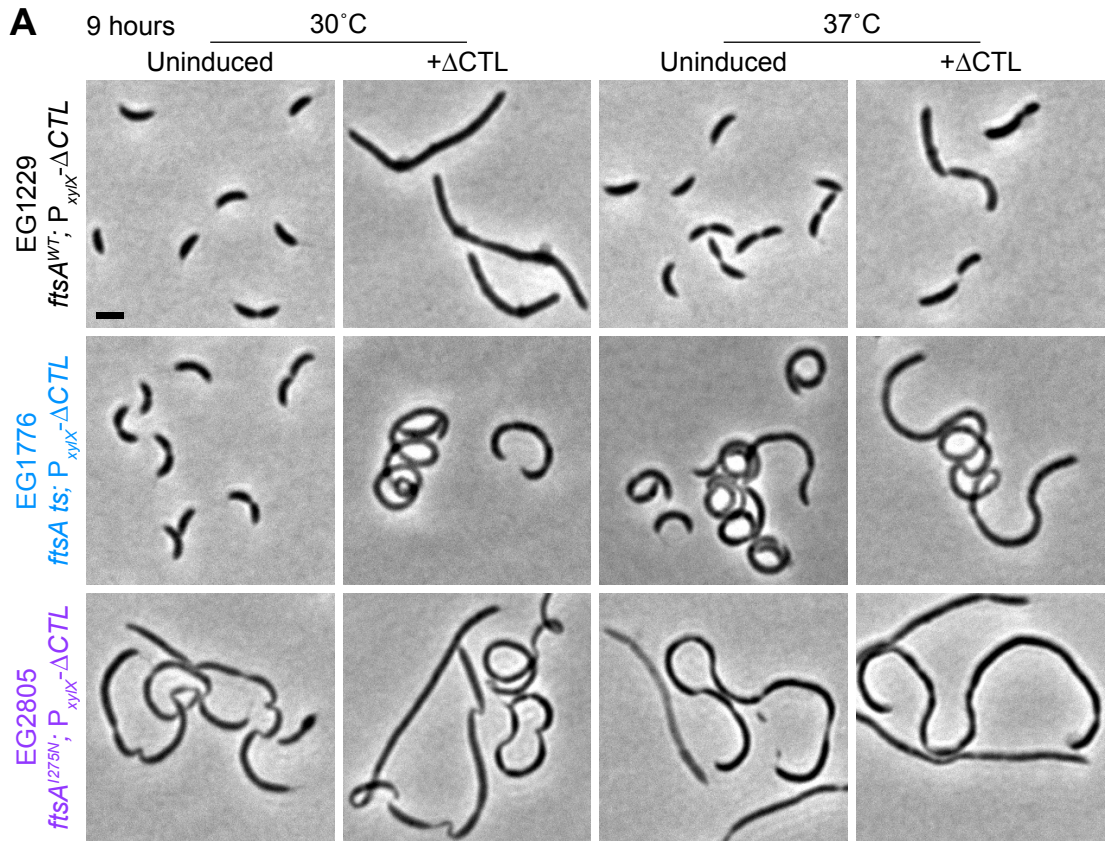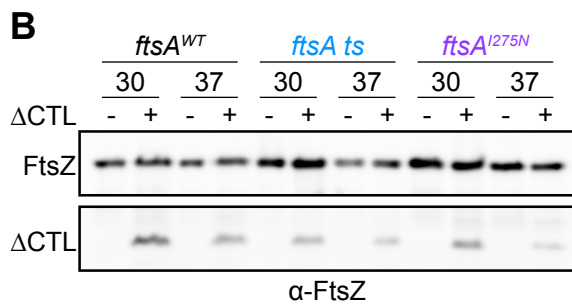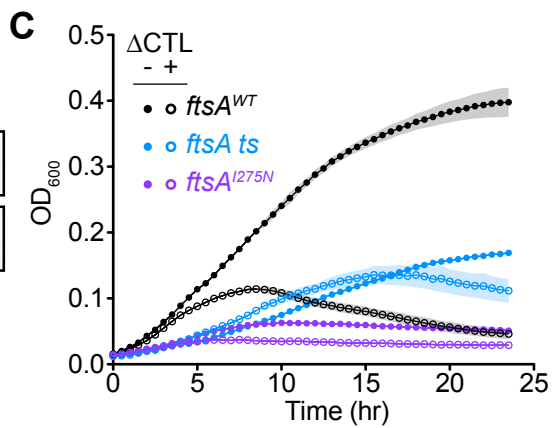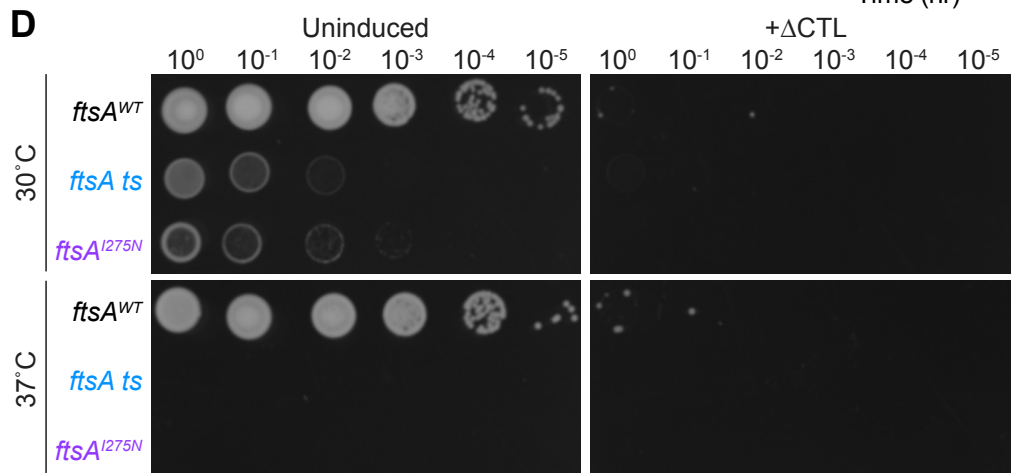

Figure S7

86 **Figure S7: A temperature sensitive *ftsA* mutant suppresses formation of  $\Delta CTL$ -induced**  
87 **bulges.**

88 **A.** Phase contrast images of cells with WT *ftsA* or a temperature sensitive allele of *ftsA* in its  
89 original mutagenized background (*ftsA ts*) or in an otherwise wild type background (*ftsA<sup>I275N</sup>*)  
90 uninduced with glucose or induced with xylose (+ $\Delta CTL$ ) for  $\Delta CTL$  expression at 30°C or 37°C  
91 for 9 hours prior to imaging. Scale bar – 2  $\mu m$ . **B.** Immunoblot using anti-FtsZ antibody on  
92 lysates from strains from A. uninduced with glucose (- $\Delta CTL$ ) or induced with xylose (+ $\Delta CTL$ )  
93 for  $\Delta CTL$  expression at 30°C or 37°C for 9 hours. **C.** Growth characteristics of the strains from  
94 A. uninduced (closed circles) or induced (open circles) for  $\Delta CTL$  expression and grown for 24  
95 hours at 30°C. Shaded regions represent SD of three technical replicates at each point. **D.** Spot  
96 dilutions of strains from A. Cells in log phase were diluted to an OD<sub>600</sub> of 0.05, serially diluted,  
97 and spotted onto PYE agar plates with either glucose (uninduced) or xylose (+ $\Delta CTL$ ). Plates  
98 were incubated at 30°C for 48 hours before imaging. Strain key (all have xylose-inducible  
99  $\Delta CTL$ ): *ftsA<sup>WT</sup>* (EG1229), *ftsA ts* (EG1776), *ftsA<sup>I275N</sup>* (EG2805)

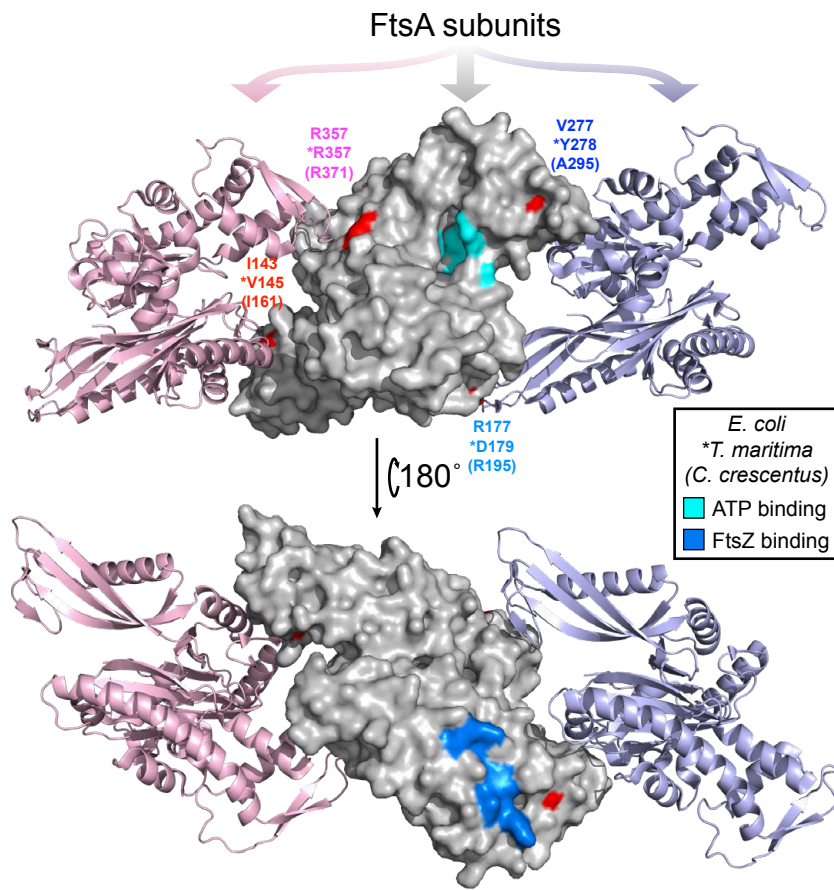

Adapted from PDB: 4A2B

Figure S8

101 **Figure S8: Locations of *ftsA* point mutations proposed to disrupt self-interaction.**

102 Each of the four analogous residues proposed to disrupt FtsA self-interaction (red) mapped onto  
103 a surface rendering (grey) of *T. maritima* FtsA in complex with two other FtsA monomers  
104 (cartoon, pink and lilac). Analogous residues in *E. coli*, *T. maritima*, and *C. crescentus* are  
105 indicated next to each location. The ATP- and FtsZ-binding sites are indicated in cyan and blue,  
106 respectively. Model was constructed using PDB: 4A2B in the PyMOL (12) program.

107

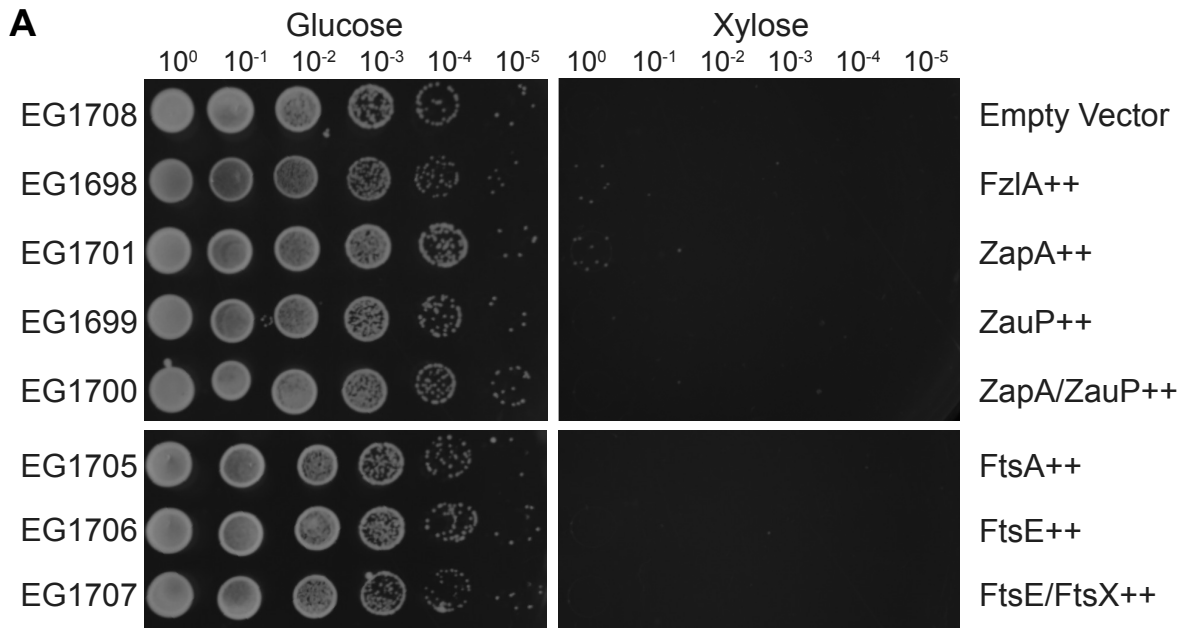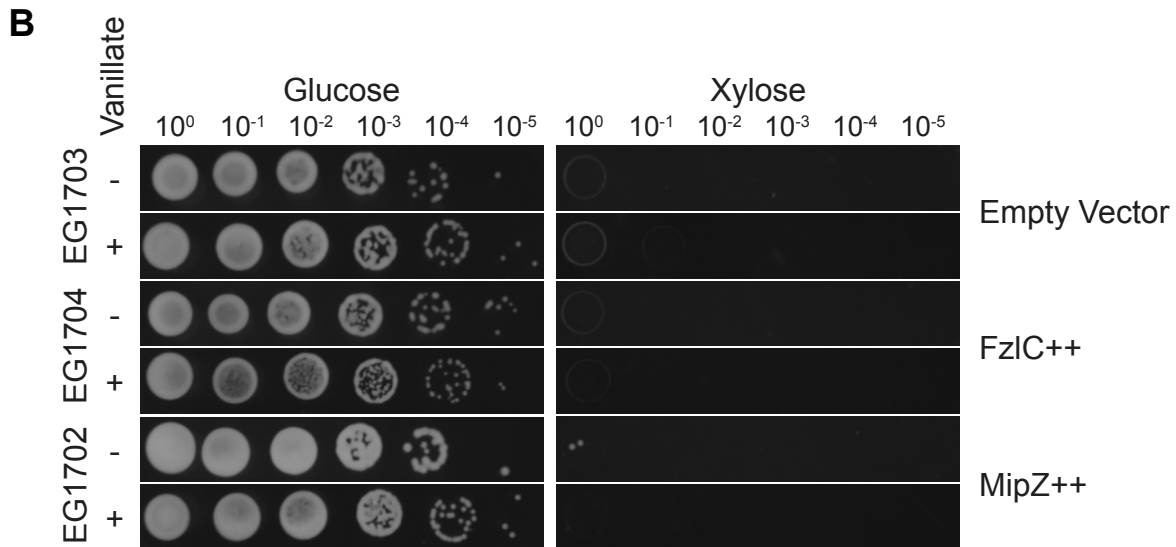

Figure S9



108 **Figure S9: Overexpression of FtsZ binding partners does not suppress  $\Delta CTL$ -induced**  
109 **growth defects.**

110 **A.-B.** Spot dilutions of strains in Figure 3 showing growth of cells uninduced (glucose) or  
111 induced (xylose) for  $\Delta CTL$  expression. Cells in log phase were diluted to an  $OD_{600}$  of 0.05,  
112 serially diluted, and spotted onto PYE agar plates with indicated inducer (glucose, xylose, and/or  
113 vanillate). Plates were incubated at 30°C for 48 hours before imaging. Strain key (all have  
114 xylose-inducible  $\Delta CTL$ ): Empty Vector (EG1708), FzlA<sup>++</sup> (EG1698), ZapA<sup>++</sup> (EG1701),  
115 ZauP<sup>++</sup> (EG1699), ZapA/ZauP<sup>++</sup> (EG1700), FtsA<sup>++</sup> (EG1705), FtsE<sup>++</sup> (EG1706),  
116 FtsE/FtsX<sup>++</sup> (EG1707), Empty Vector (EG1703), FzlC<sup>++</sup> (EG1704), MipZ<sup>++</sup> (EG1702)

117

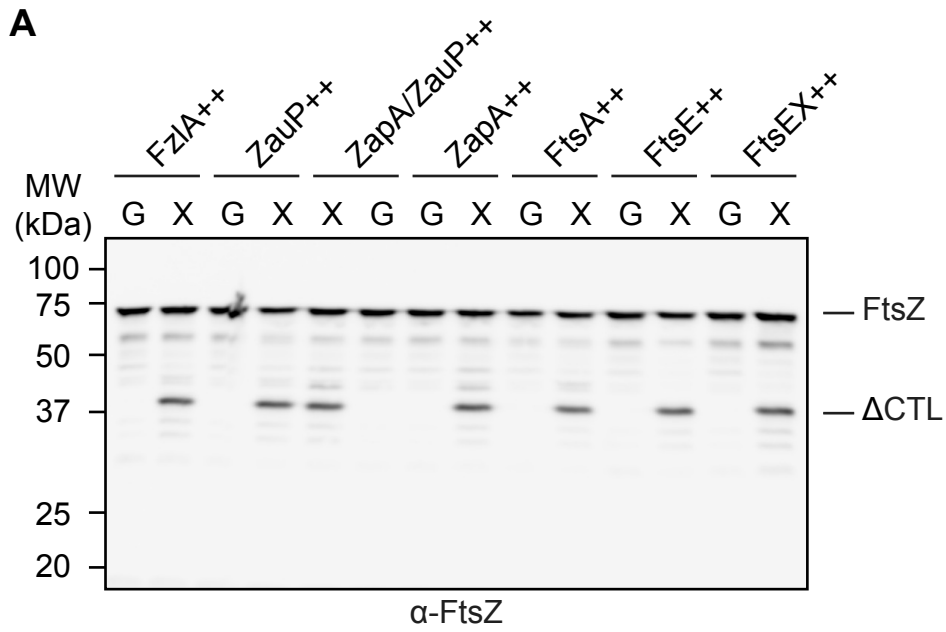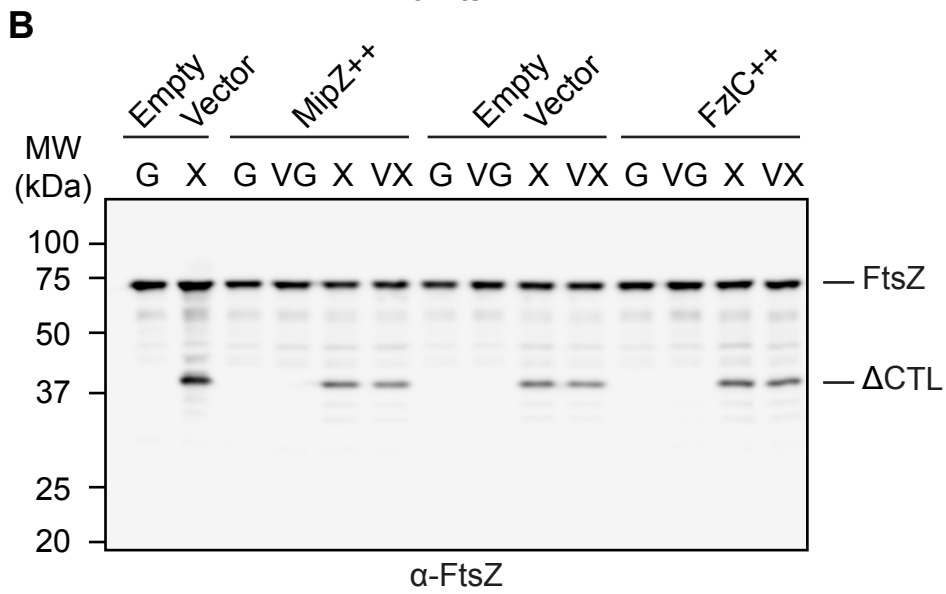

Figure S10

118 **Figure S10: Levels of FtsZ and  $\Delta$ CTL are not impacted by overexpression of binding**  
119 **partners.**

120 **A.-B.** Immunoblots using anti-FtsZ antibody showing protein levels of  $\Delta$ CTL and WT FtsZ  
121 corresponding to the experiments in Figure 3 at 6.5 hours of incubation with inducers (glucose or  
122 G, vanillate or V, xylose or X). Strain key (all have xylose-inducible  *$\Delta$ CTL*): Empty Vector  
123 (EG1708), FzlA<sup>++</sup> (EG1698), ZapA<sup>++</sup> (EG1701), ZauP<sup>++</sup> (EG1699), ZapA/ZauP<sup>++</sup> (EG1700),  
124 FtsA<sup>++</sup> (EG1705), FtsE<sup>++</sup> (EG1706), FtsE/FtsX<sup>++</sup> (EG1707), Empty Vector (EG1703), FzlC<sup>++</sup>  
125 (EG1704), MipZ<sup>++</sup> (EG1702)

126

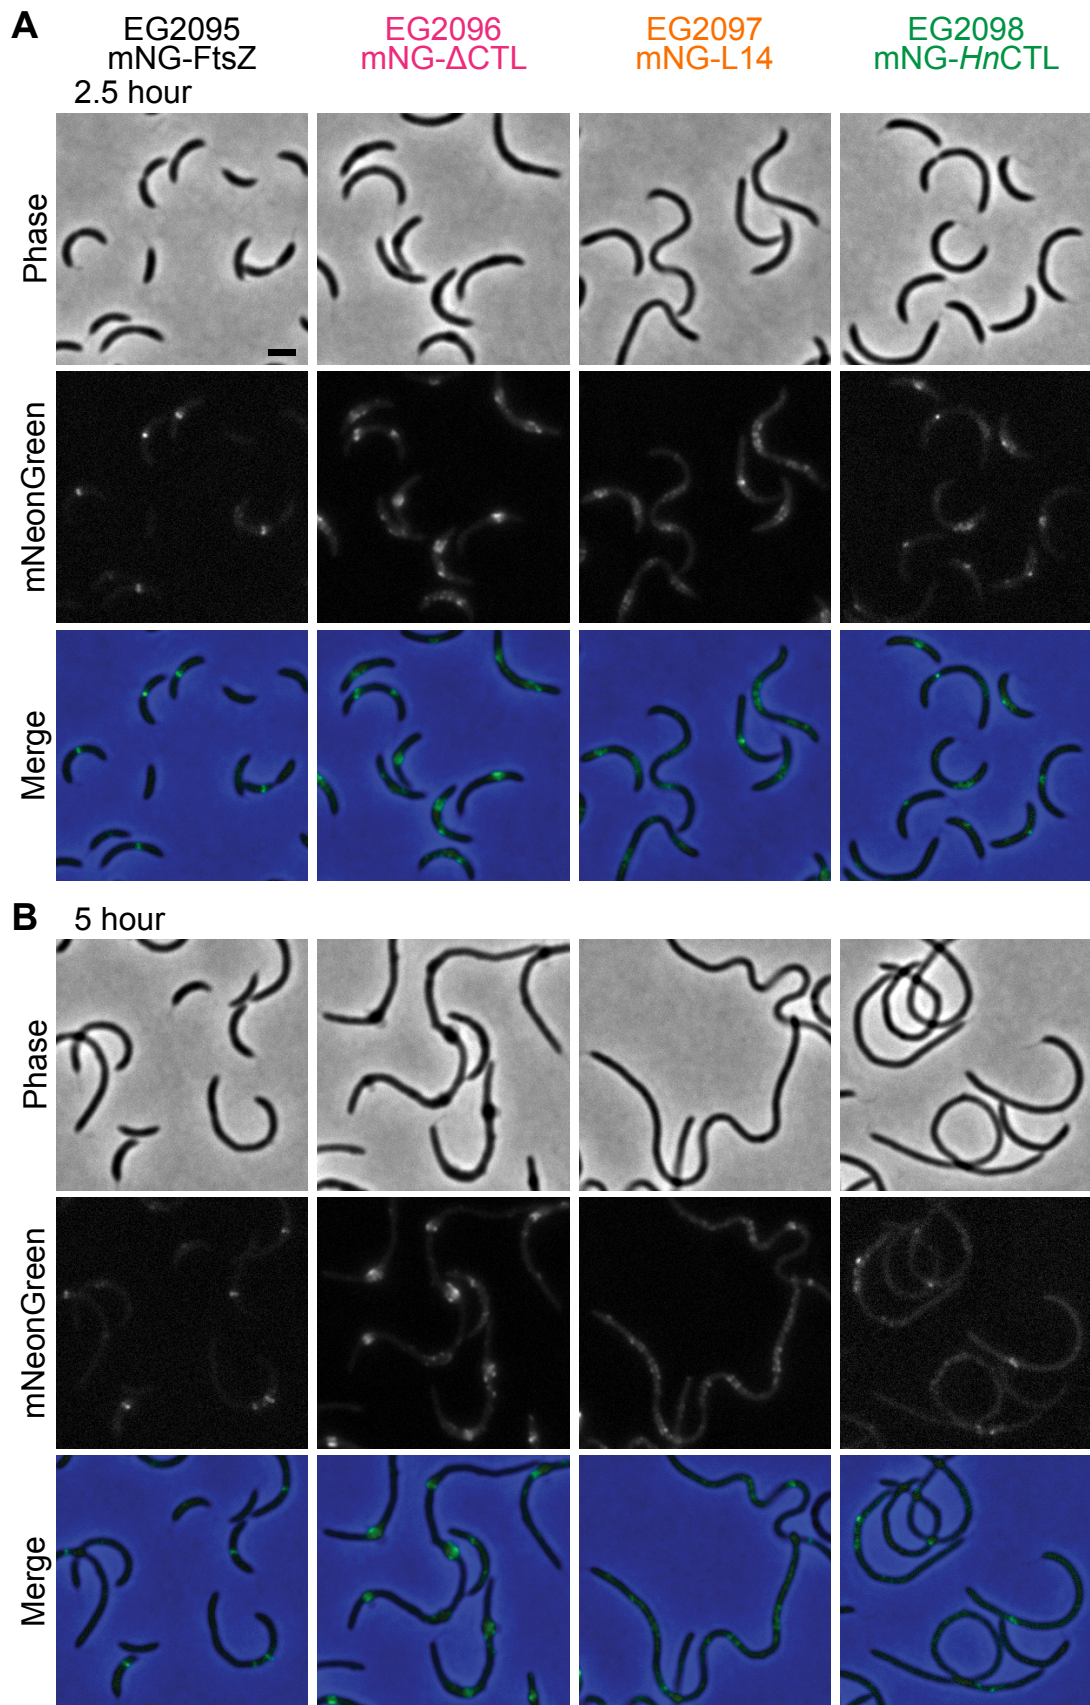

Figure S11

127 **Figure S11:  $\Delta$ CTL assembles into large asymmetric superstructures at sites of cell wall**  
128 **bulging in cells depleted of WT FtsZ.**

129 **A.-B.** Phase contrast, epifluorescence, and merged images of cells induced with xylose to drive  
130 expression of *mNG-FtsZ*, *mNG- $\Delta$ CTL*, *mNG-L14*, or *mNG-HnCTL* from  $P_{xyIX}$  promoter for 2.5  
131 hours (**A**) or 5 hours (**B**) while simultaneously depleting WT FtsZ. Scale bar – 2  $\mu$ m. Strain key:  
132 mNG-FtsZ (EG2095), mNG- $\Delta$ CTL (EG2096), mNG-L14 (EG2097), mNG-*HnCTL* (EG2098)

133

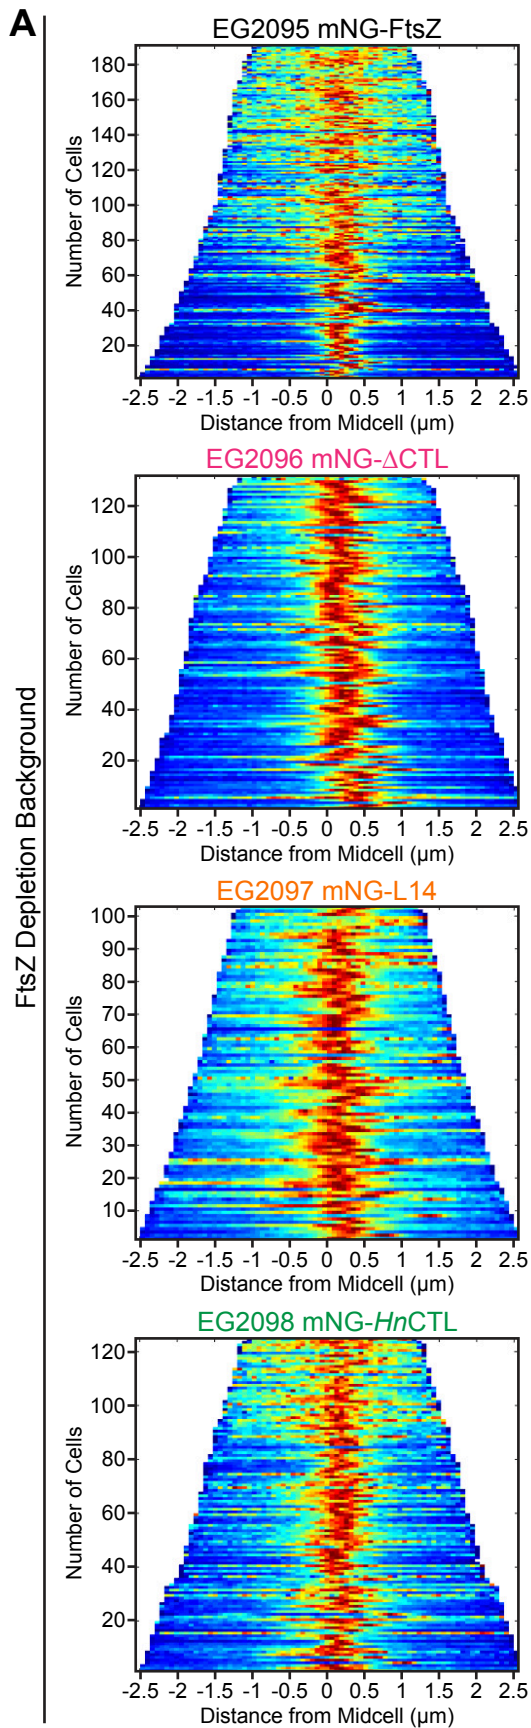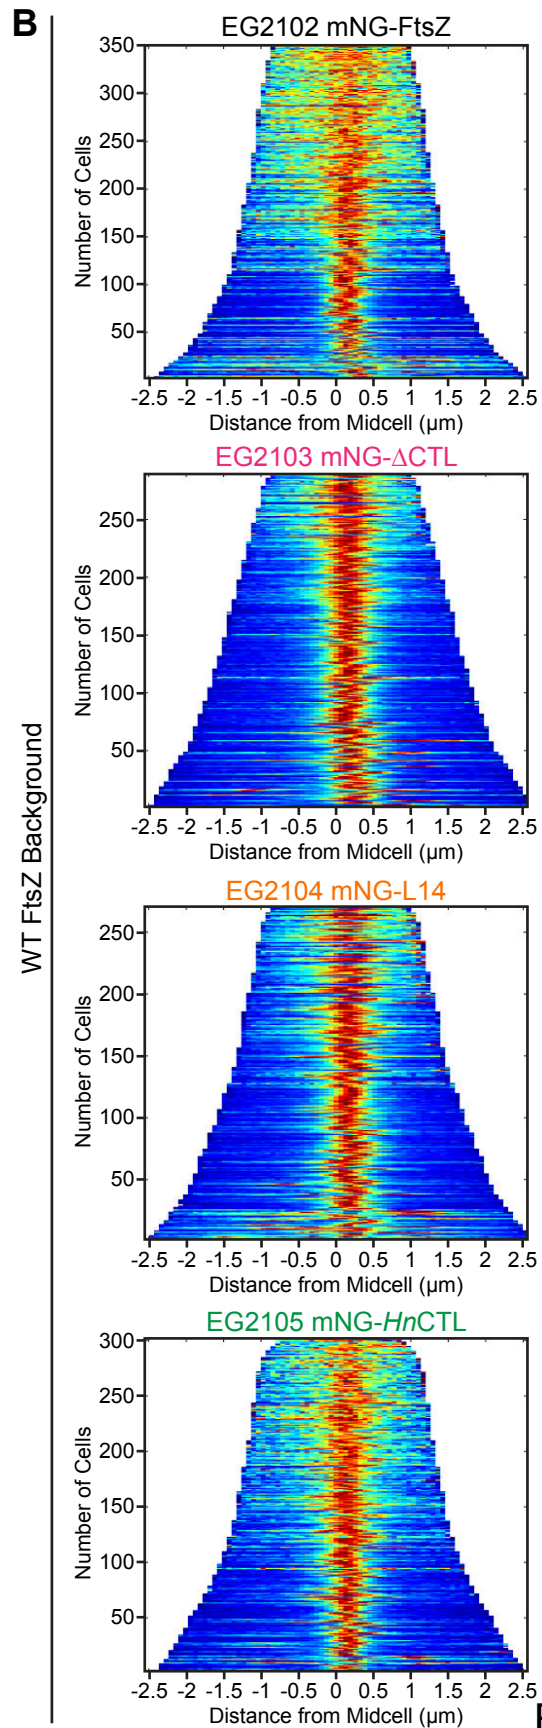

Figure S12

134 **Figure S12: Demographs show differences in FtsZ distribution among CTL variants in**  
135 **FtsZ depletion and FtsZ WT backgrounds.**

136 **A.-B.** Demographs showing mNG intensity as a function of cell length (blue = least intense pixel  
137 in each cell, red = most intense pixel in each cell) of a population of cells (length  $\leq 5 \mu\text{m}$ )  
138 represented in Figure 5A (**A**) and Figure S14A (**B**). Strain key: mNG-FtsZ (EG2095), mNG-  
139  $\Delta$ CTL (EG2096), mNG-L14 (EG2097), mNG-*Hn*CTL (EG2098), mNG-FtsZ/FtsZ (EG2102),  
140 mNG- $\Delta$ CTL/FtsZ (EG2103), mNG-L14/FtsZ (EG2104), mNG-*Hn*CTL/FtsZ (EG2105)

141



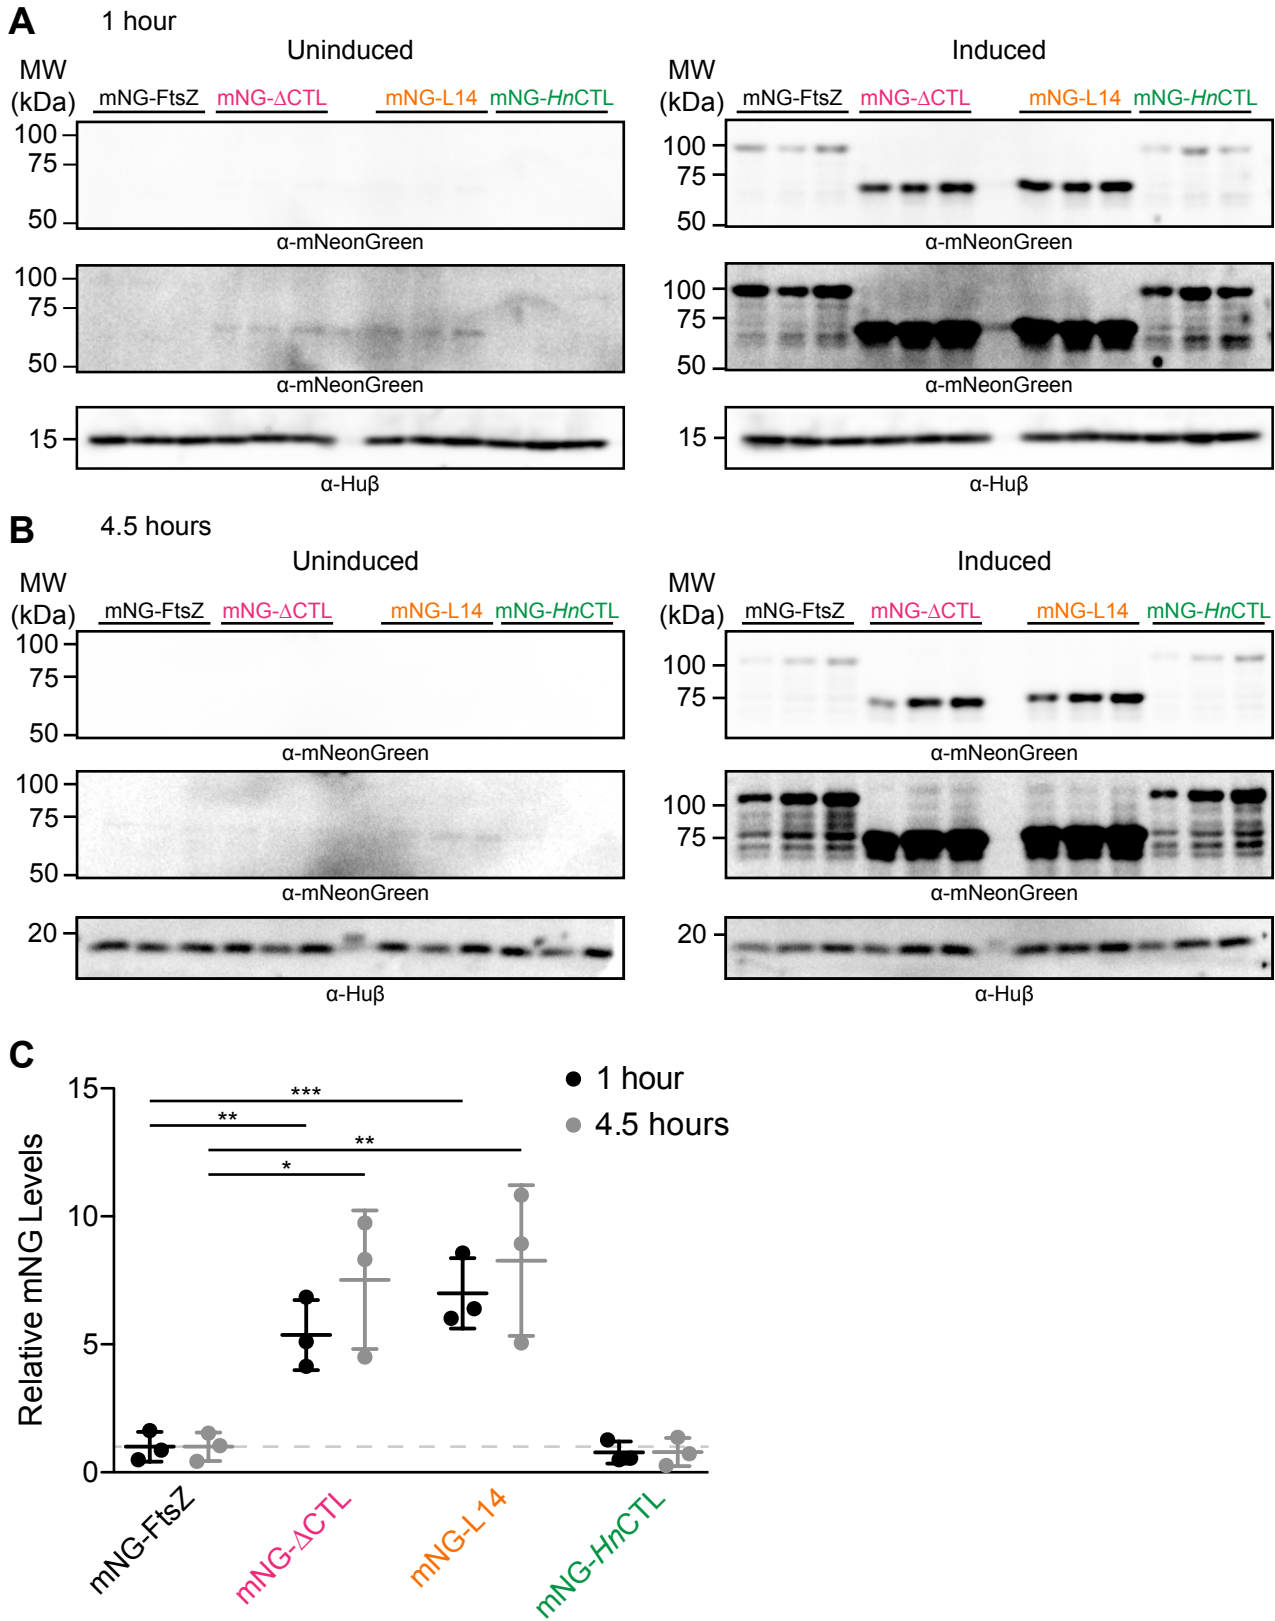

Figure S13



142 **Figure S13: mNG- $\Delta$ CTL and mNG-L14 FtsZ variants are present at elevated levels in cells**  
143 **depleted for WT FtsZ.**

144 **A.-B.** Immunoblots using anti-mNeonGreen antibody against lysates from cells depleted for FtsZ  
145 and uninduced (glucose and vanillate) or induced (xylose) for *mNG-FtsZ*, *mNG- $\Delta$ CTL*, *mNG-*  
146 *L14*, or *mNG-HnCTL* for 1 hour (**A**) or 4.5 hours (**B**). Overexposed blots are also shown below  
147 each blot to validate lack of signal in uninduced controls. Anti-Hu $\beta$  antibody was used as  
148 concentration control for loading and quantification. **C.** Quantification of immunoblots from A.  
149 and B. showing relative abundance of mNG-FtsZ variants after 1 hour (black) or 4.5 hours  
150 (grey). Bars represent standard deviation. \* -  $P \leq 0.05$ ; \*\* -  $P \leq 0.01$ ; \*\*\* -  $P \leq 0.001$ . Strain key:  
151 mNG-FtsZ (EG2095), mNG- $\Delta$ CTL (EG2096), mNG-L14 (EG2097), mNG-*HnCTL* (EG2098)

152

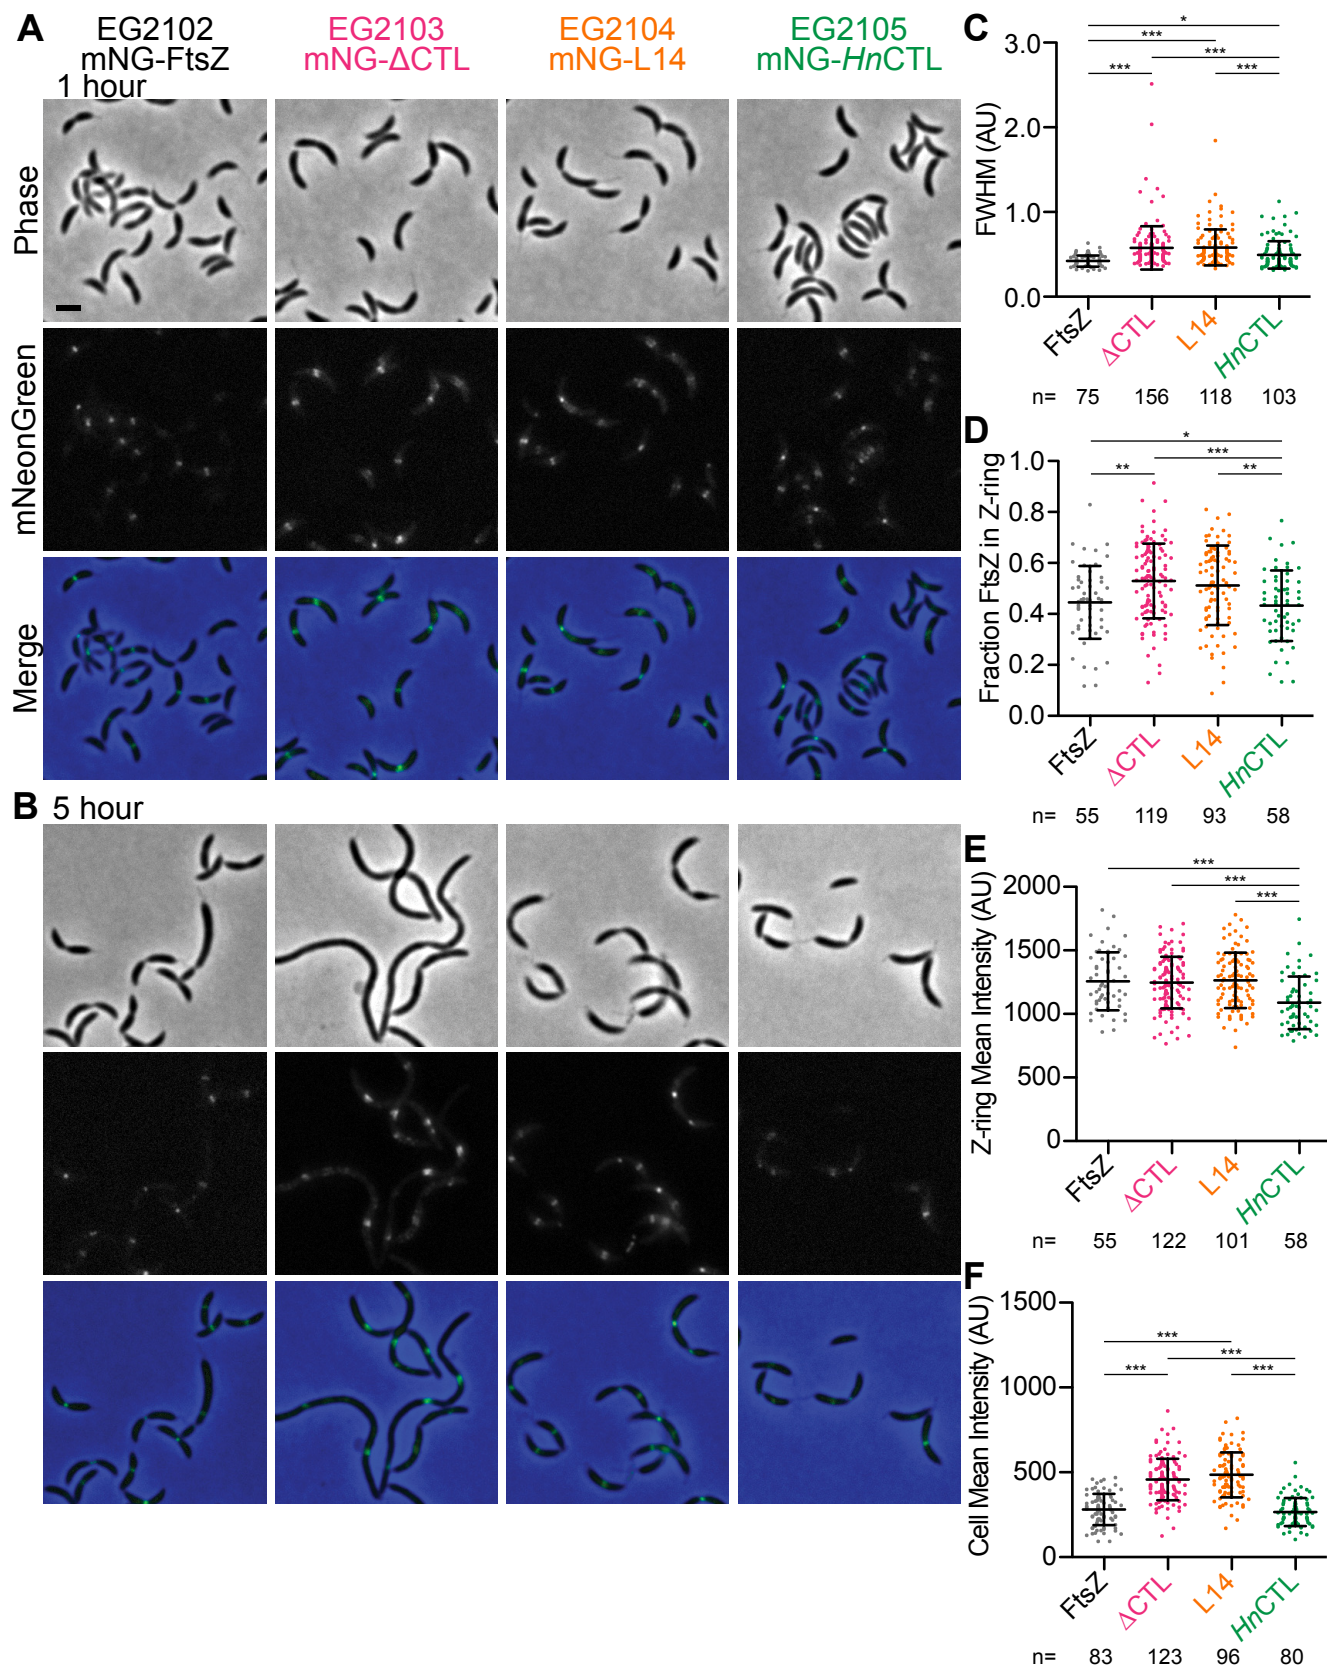

Figure S14

153 **Figure S14: The CTL impacts Z-ring organization in the presence of WT FtsZ.**

154 **A.-B.** Phase contrast, epifluorescence, and merged images of cells induced with xylose to drive  
155 expression of *mNG-FtsZ*, *mNG-ΔCTL*, *mNG-L14*, or *mNG-HnCTL* from  $P_{xyIX}$  promoter for 1  
156 hour (**A**) or 5 hours (**B**) in strains producing WT FtsZ. **C.-F.** Quantification of epifluorescence  
157 images of cells 3 to 5  $\mu\text{m}$  long indicating the full-width at half max (FWHM) values of Z-ring  
158 intensity (**C**), fraction of mNG-FtsZ or variants in the Z-ring (**D**), and mean epifluorescence  
159 intensity of the whole cells (**E**) or the Z-ring (**F**) in a WT FtsZ background. Bars represent  
160 standard deviation. \* -  $P \leq 0.05$ ; \*\* -  $P \leq 0.01$ ; \*\*\* -  $P \leq 0.001$ . Numbers of cells per strain are  
161 indicated for each measurement. Strain key: mNG-FtsZ/FtsZ (EG2102), mNG-ΔCTL/FtsZ  
162 (EG2103), mNG-L14/FtsZ (EG2104), mNG-HnCTL/FtsZ (EG2105)

163

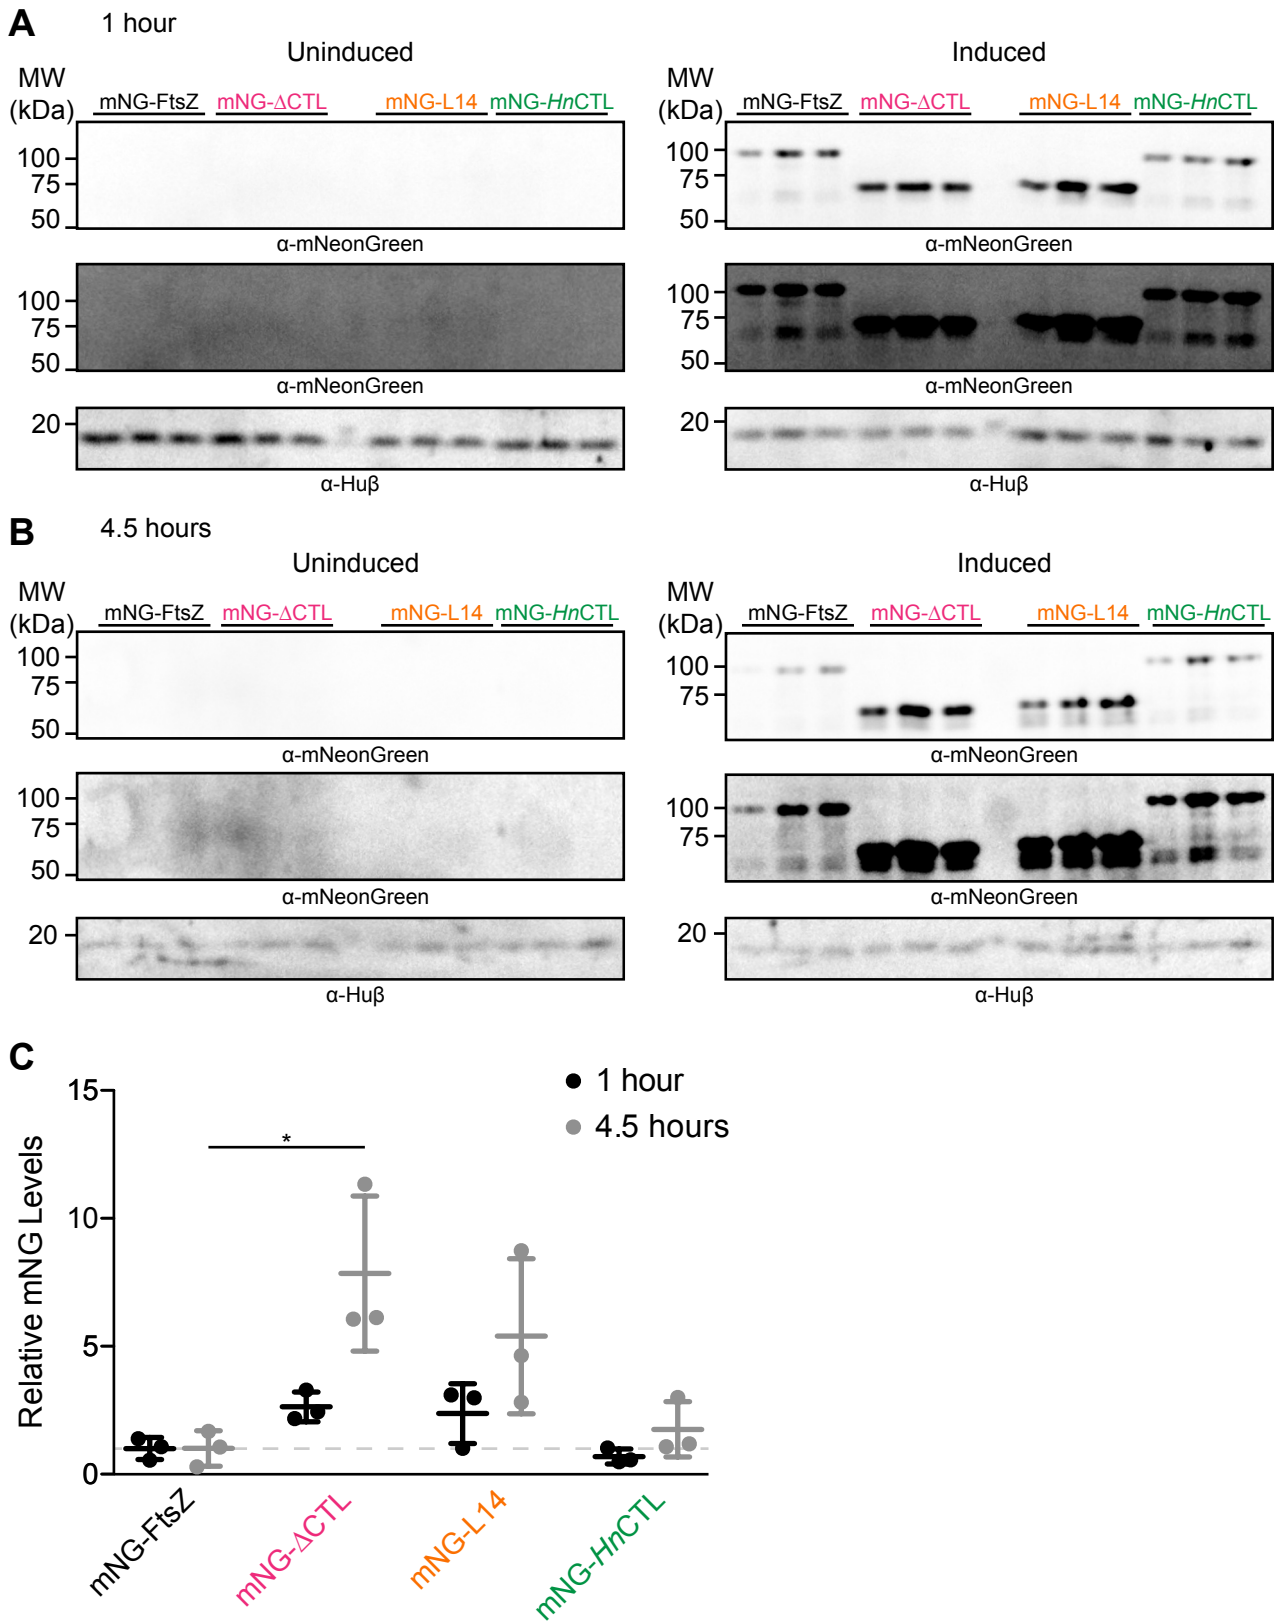

Figure S15

164 **Figure S15: mNG- $\Delta$ CTL FtsZ is present at elevated levels in the presence of WT FtsZ.**

165 **A.-B.** Immunoblots using anti-mNeonGreen antibody against lysates from cells uninduced

166 (glucose) or induced (xylose) for *mNG-FtsZ*, *mNG- $\Delta$ CTL*, *mNG-L14*, or *mNG-HnCTL* for 1 hour

167 (**A**) or 4.5 hours (**B**). Overexposed blots are also shown below each blot to validate lack of signal

168 in uninduced controls. Anti-Hu $\beta$  antibody was used as concentration control for loading and

169 quantification. **C.** Quantification of immunoblots from A. and B. showing relative abundance of

170 mNG-FtsZ variants after 1 hour (black) or 4.5 hours (grey). Bars represent standard deviation. \* -

171  $P \leq 0.05$ . Strain key: mNG-FtsZ/FtsZ (EG2102), mNG- $\Delta$ CTL/FtsZ (EG2103), mNG-L14/FtsZ

172 (EG2104), mNG-*HnCTL*/FtsZ (EG2105)

173



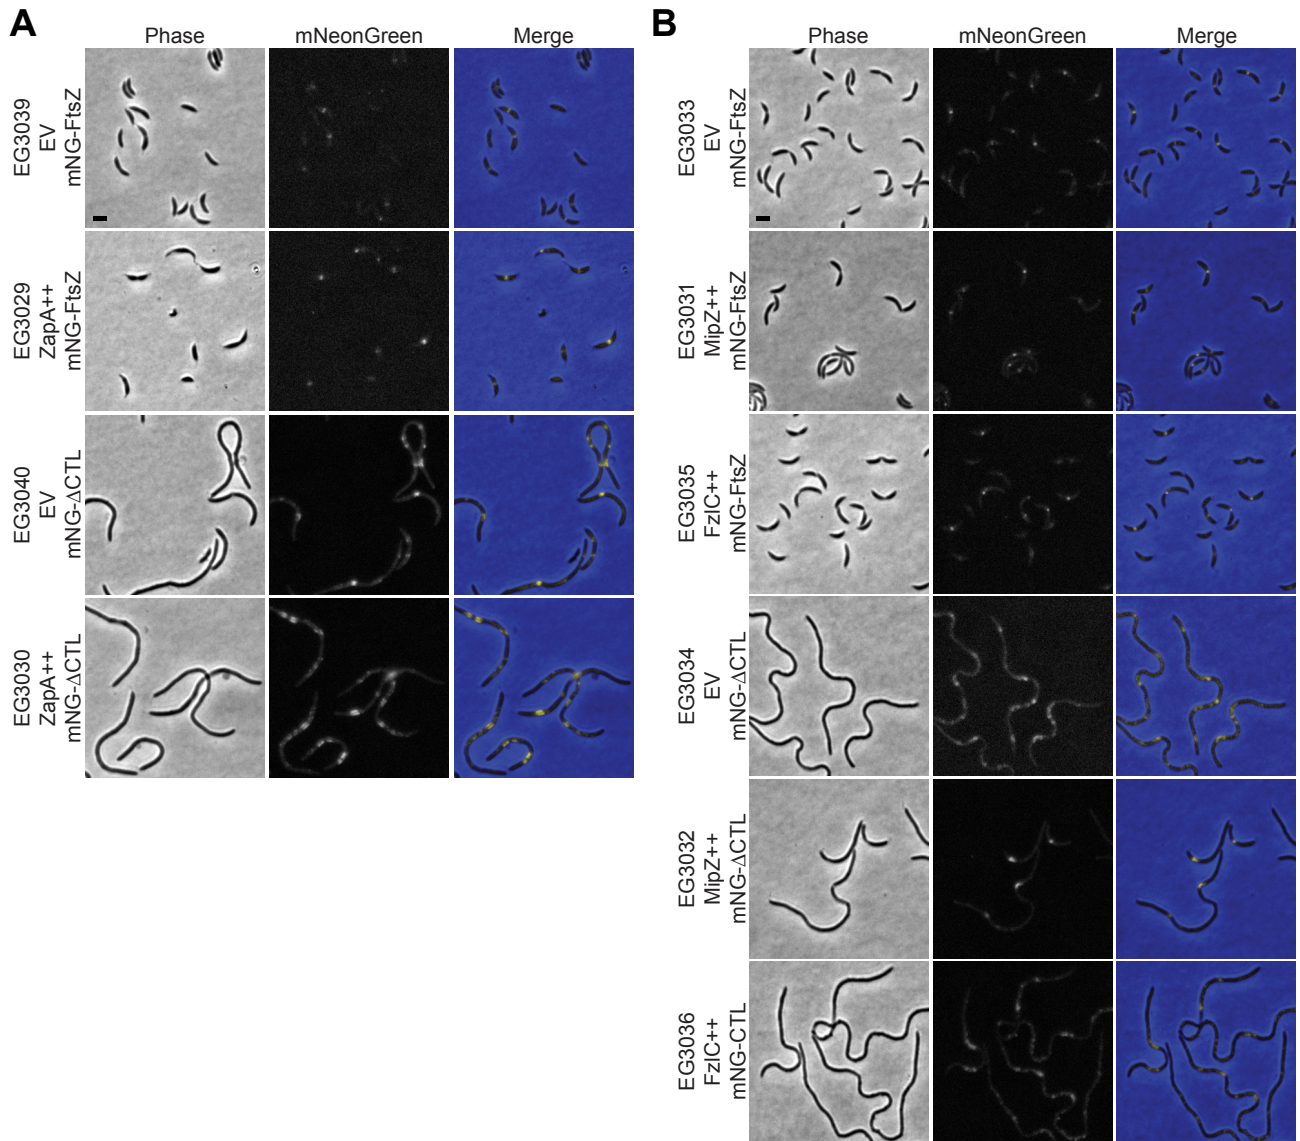

Figure S16

174 **Figure S16: mNG-FtsZ and mNG- $\Delta$ CTL localization are unaffected by overproduction of**  
175 **ZapA, MipZ, or FzlC.**

176 **A.** Phase contrast, epifluorescence, and merged images of cells induced with xylose to drive  
177 expression of either *mNG-FtsZ* or *mNG- $\Delta$ CTL* and empty vector or *zapA* from  $P_{xyIX}$  promoter for  
178 6.5 hours. **B.** Phase contrast, epifluorescence, and merged images of cells induced with xylose  
179 and vanillate to drive expression of either *mNG-FtsZ* or *mNG- $\Delta$ CTL* from  $P_{xyIX}$  and empty vector,  
180 *mipZ*, or *fzlC* from  $P_{vanA}$  promoter for 6.5 hours. Scale bar – 2  $\mu$ m. Strain key: Empty  
181 vector/mNG-FtsZ (EG3039), ZapA<sup>++</sup>/mNG-FtsZ (EG3029), Empty vector/mNG- $\Delta$ CTL (EG  
182 3040), ZapA<sup>++</sup>/mNG- $\Delta$ CTL (EG3030), Empty vector/mNG-FtsZ (EG3033), MipZ<sup>++</sup>/mNG-  
183 FtsZ (EG3031); FzlC<sup>++</sup>/mNG-FtsZ (EG3035); Empty vector/mNG- $\Delta$ CTL (EG3034),  
184 MipZ<sup>++</sup>/mNG- $\Delta$ CTL (EG3032), FzlC<sup>++</sup>/mNG- $\Delta$ CTL (EG3036)

185

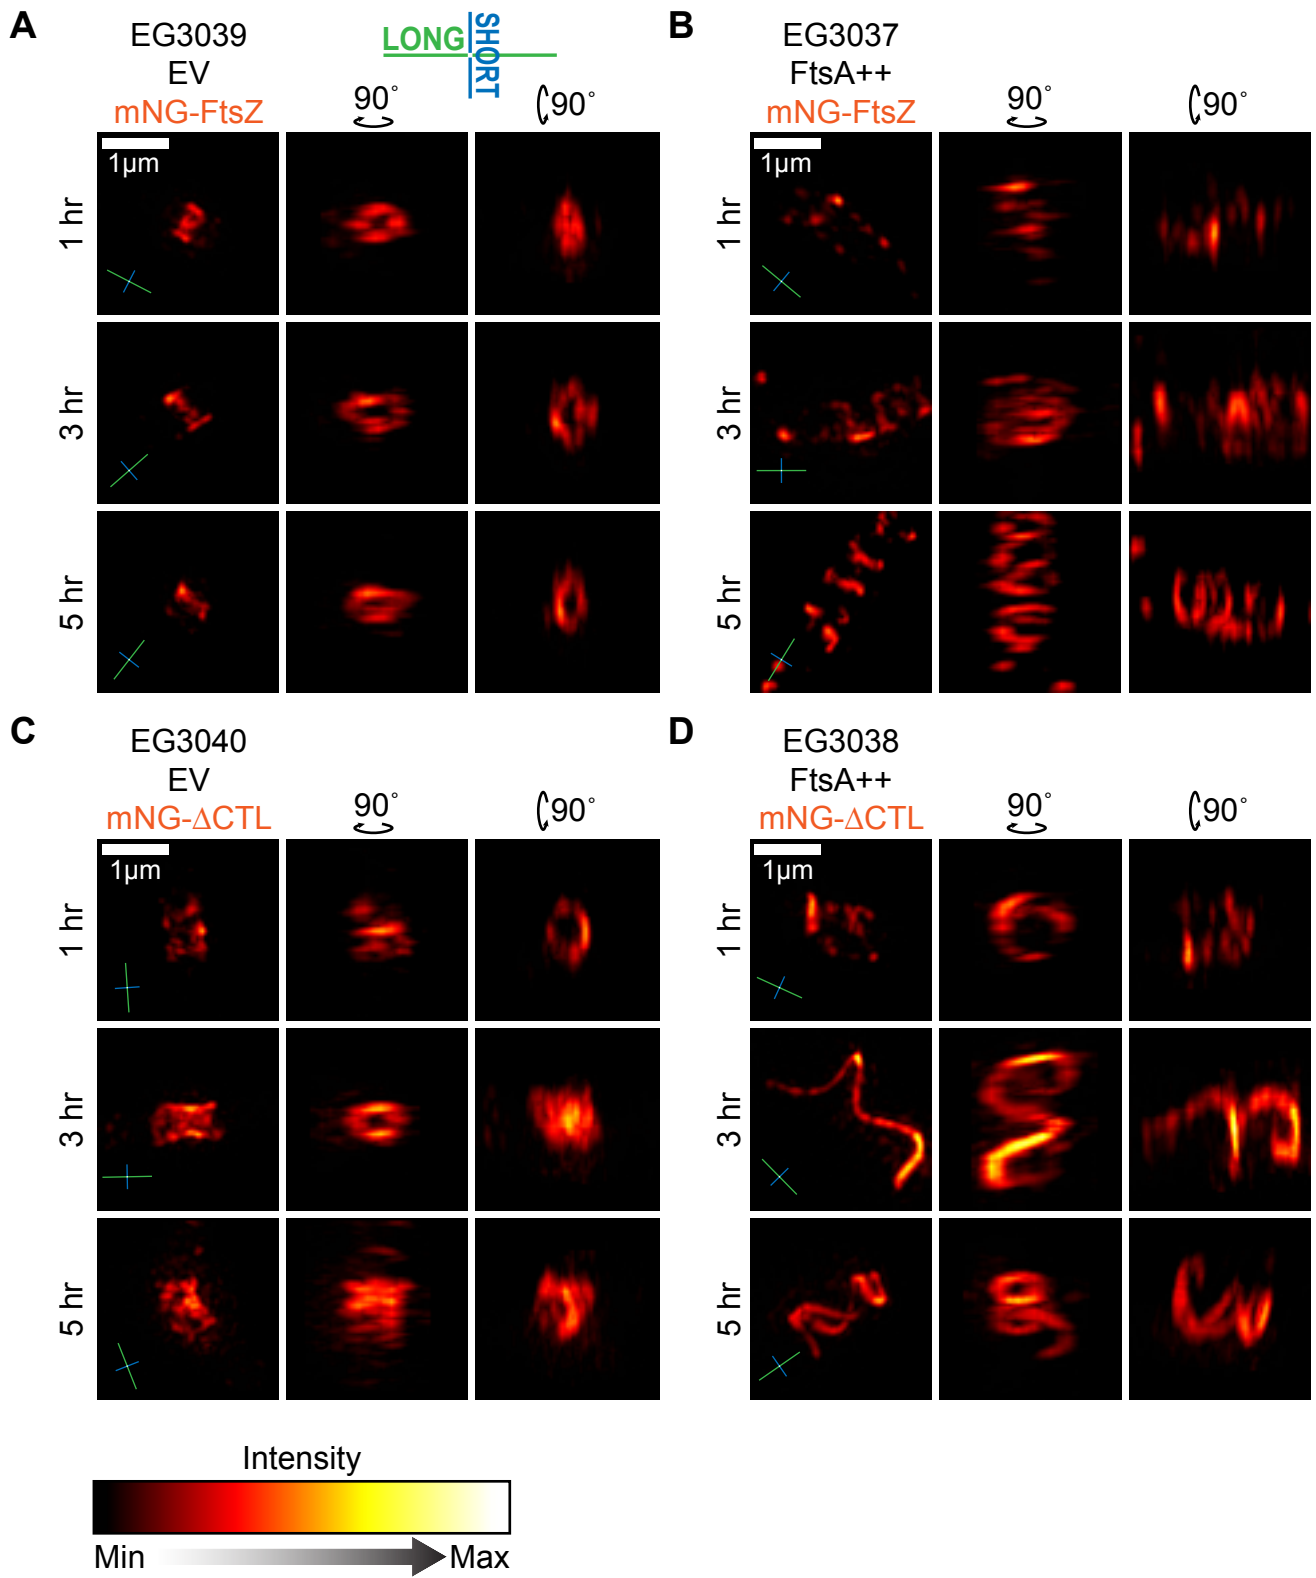

Figure S17



186 **Figure S17: FtsA overproduction interferes with Z-ring assembly and causes mNG- $\Delta$ CTL**  
187 **to form long helical structures *in vivo***

188 **A.-D.** Orthogonal views of 3D-projections of image stacks acquired by 3D-SIM visualization of  
189 Z-rings in cells induced with xylose to drive expression of empty vector and *mNG-FtsZ* (**A**), *ftsA*  
190 and *mNG-FtsZ* (**B**), empty vector and *mNG- $\Delta$ CTL* (**C**), or *ftsA* and *mNG- $\Delta$ CTL* (**D**) from P<sub>xyI<sub>X</sub></sub>  
191 promotor for indicated amounts of time. Compasses in lower left of each image indicate the  
192 orientation of long (green) and short (blue) axes of cells. Scale bars – 1  $\mu$ m. Strain key: Empty  
193 vector/*mNG-FtsZ* (EG3039), FtsA<sup>++</sup>/*mNG-FtsZ* (EG3037), Empty vector/*mNG- $\Delta$ CTL*  
194 (EG3040), FtsA<sup>++</sup>/*mNG- $\Delta$ CTL* (EG3038)

195

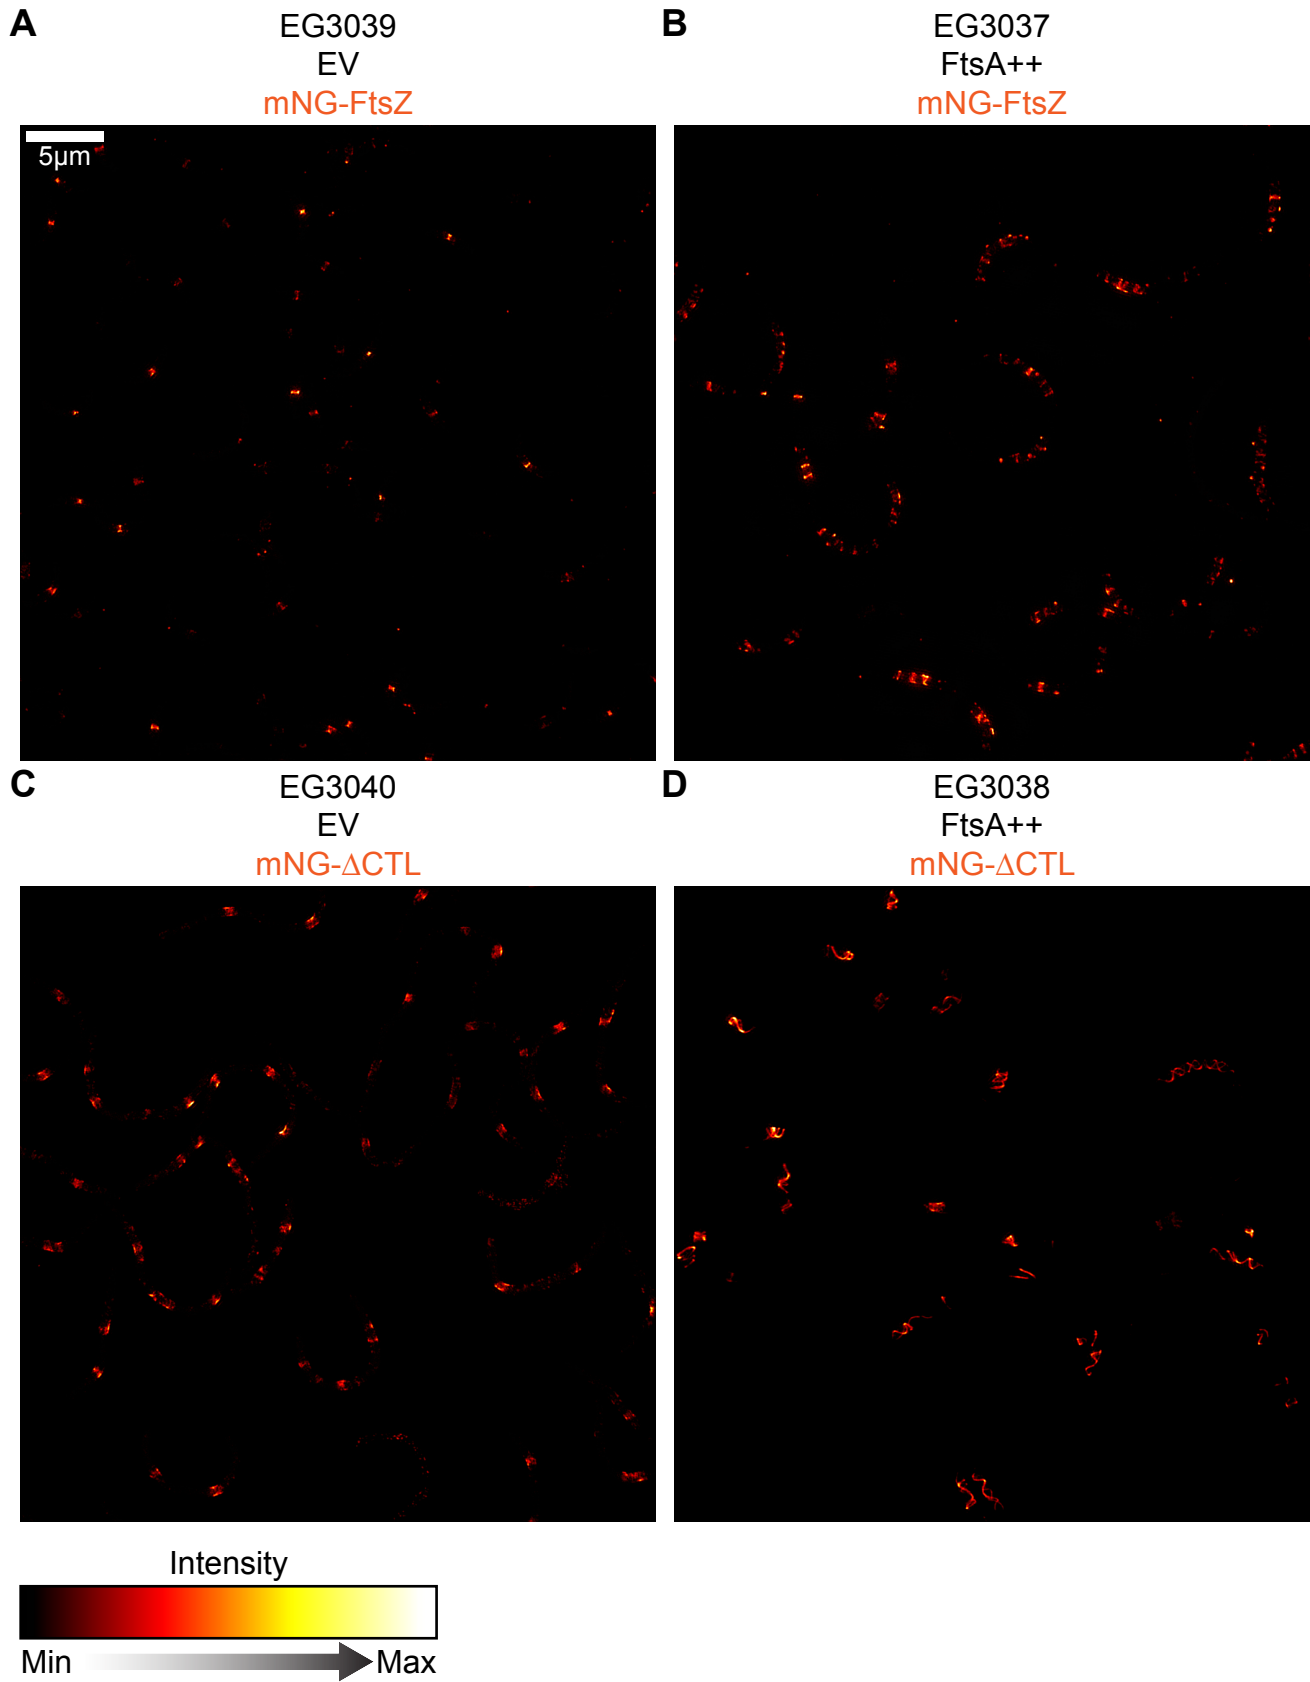

Figure S18

196 **Figure S18: Representative 3D-SIM z-projections showing mNG-FtsZ and mNG- $\Delta$ CTL Z-**  
197 **ring morphologies.**

198 **A.-D.** Three dimensional z-projections generated from whole field of view image stacks  
199 acquired by 3D-SIM visualization of Z-rings in cells induced with xylose to drive expression of  
200 empty vector and *mNG-FtsZ* (**A**), *ftsA* and *mNG-FtsZ* (**B**), empty vector and *mNG- $\Delta$ CTL* (**C**), or  
201 *ftsA* and *mNG- $\Delta$ CTL* (**D**) from  $P_{xyLX}$  promotor for 5 hours prior to imaging. Scale bar – 5  $\mu$ m.  
202 Strain key: Empty vector/mNG-FtsZ (EG3039), FtsA<sup>++</sup>/mNG-FtsZ (EG3037), Empty  
203 vector/mNG- $\Delta$ CTL (EG3040), FtsA<sup>++</sup>/mNG- $\Delta$ CTL (EG3038)

204

205 **Supplemental Videos S1-4: Movies of 3D-SIM mNG-FtsZ or mNG- $\Delta$ CTL Z-ring**  
206 **morphologies**

207 Movies showing wobble representations of three-dimensional z-projections generated from fields  
208 of view from image stacks acquired by 3D-SIM visualization of cells induced with xylose to  
209 drive expression of *mNG-FtsZ* and empty vector (**1**), *mNG-FtsZ* and *ftsA* (**2**), *mNG- $\Delta$ CTL* and  
210 empty vector (**3**), or *mNG- $\Delta$ CTL* and *ftsA* (**4**) from  $P_{xytX}$  promoter for 5 hours prior to imaging.  
211 Scale bar – 1  $\mu$ m. Strain key: Empty vector/mNG-FtsZ (EG3039), FtsA<sup>++</sup>/mNG-FtsZ (EG3037),  
212 Empty vector/mNG- $\Delta$ CTL (EG3040), FtsA<sup>++</sup>/mNG- $\Delta$ CTL (EG3038)

213 **Supplemental Table S1: List of strains used in this study**

214 **Supplemental Table S2: List of plasmids used in this study**

215

216
